# Supplementary material for: TBC-domain GAPs for Rab GTPases accelerate GTP hydrolysis by a dual-finger mechanism
Source: Springer Nature journal article supplement (doi:10.1038/nature04847), 2006-07-01
Supplement: nature04847-s5.pdf [file nature04847-s5.pdf]

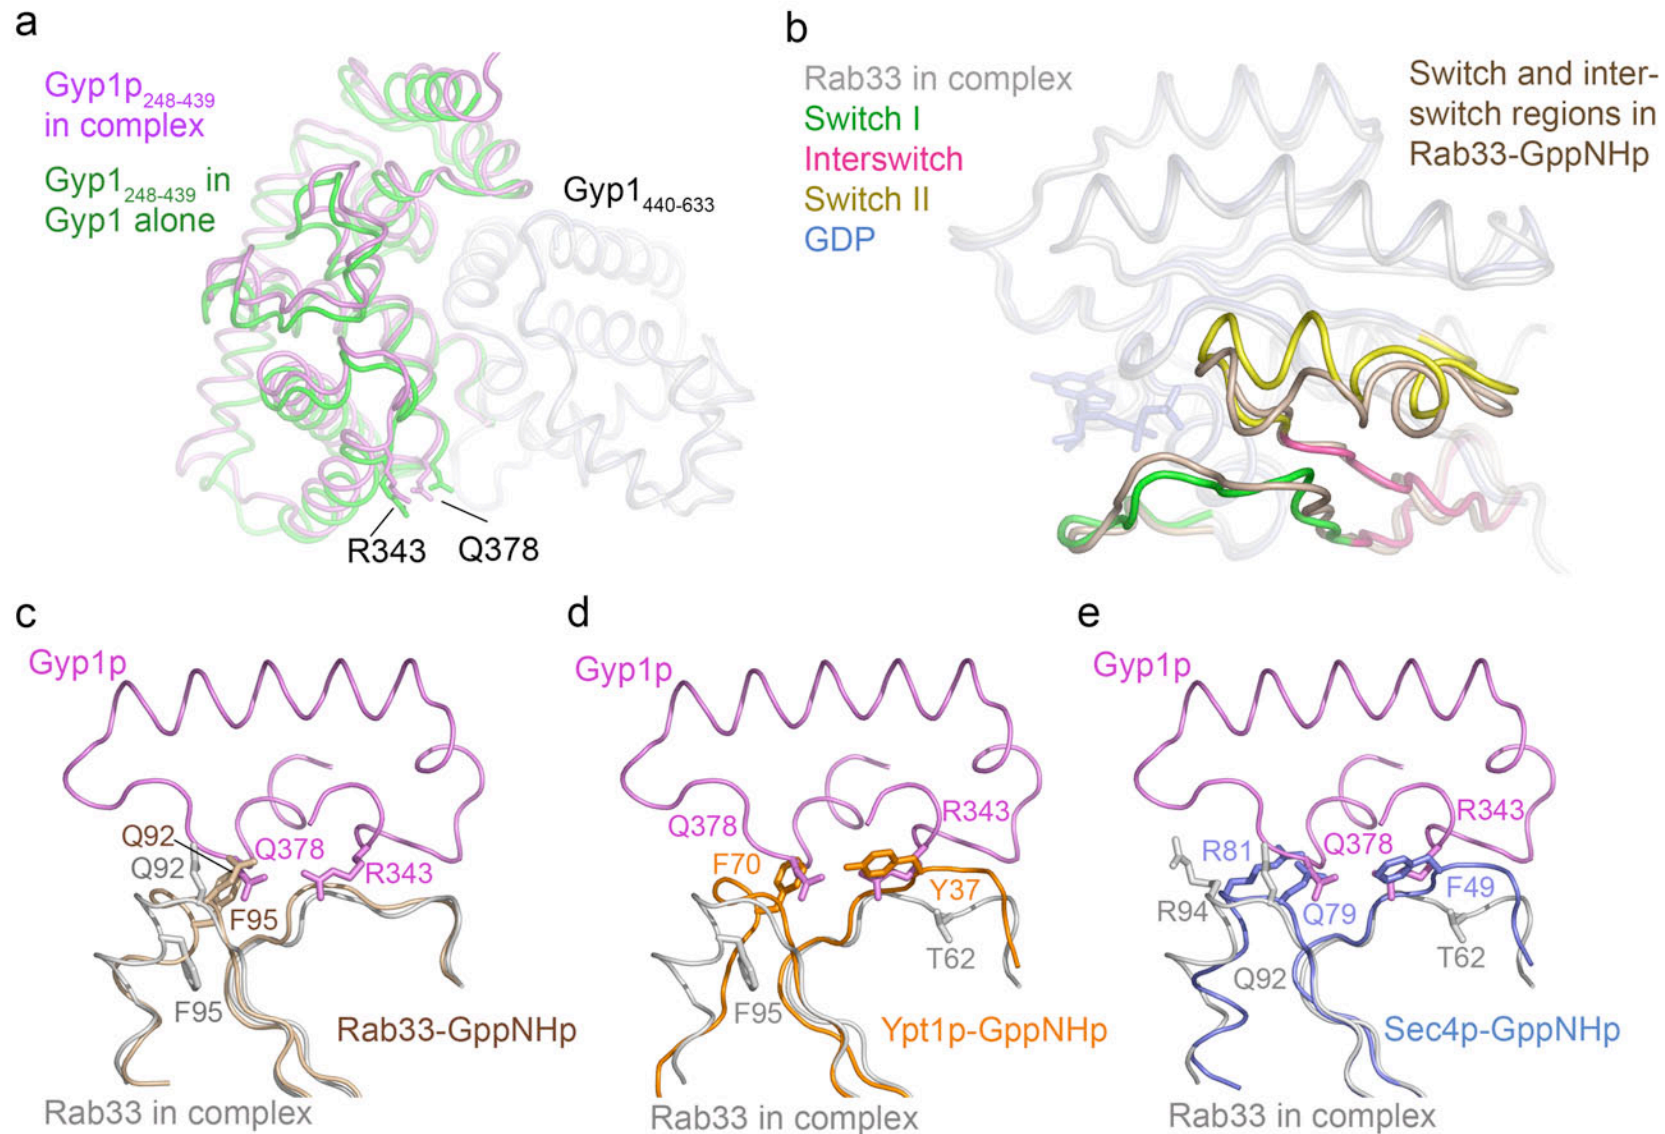

**Supplementary Figure S5.** Comparison following superposition with Gyp1p or Rab33-GDP from the AIF<sub>3</sub> complex. **a**, Gyp1p alone (PDB ID code: 1FKM). **b**, Rab33-GppNHp (PDB ID code: 1Z06). **c**, Rab33-GppNHp (PDB ID code: 1Z06). **d**, Ypt1p-GppNHp (PDB ID code: 1YZN). **e**, Sec4p-GppNHp (PDB ID code: 1G17).
